# Supplementary material
Source: PubMed Central journal article supplement (PMC8491322)
Supplement: NIHMS1742719-supplement-Suppl_pdf.pdf [file NIHMS1742719-supplement-Suppl_pdf.pdf]

**Association of Sonic Hedgehog with the extracellular matrix requires its zinc-coordination center**

Supplemental Figures

Carina Jägers and Henk Roelink\*

University of California, Berkeley, United States

\*corresponding author: roelink@berkeley.edu

Short title:

The putative peptidase function of Shh

# Supplementary Figure 1

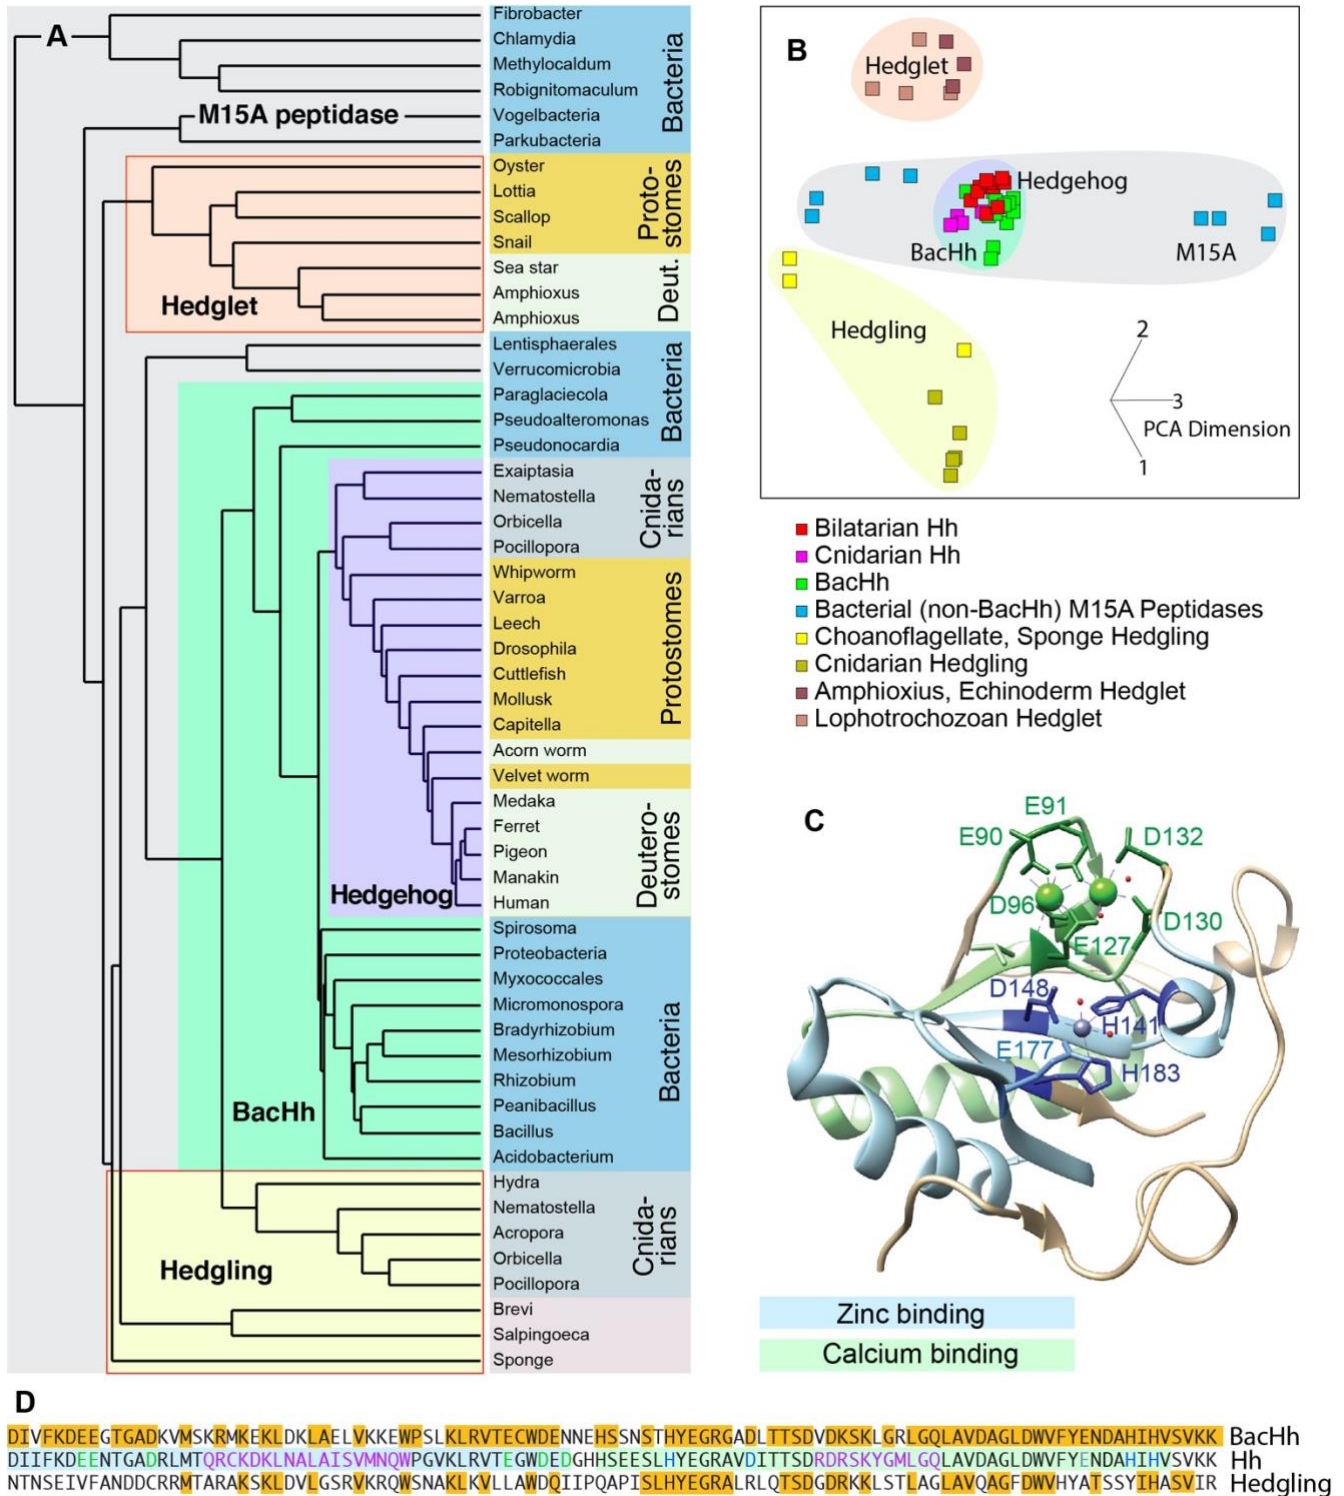

**Supplementary Figure 1.** Sequence similarities between BacHs, Hhs, Hedglings, and Hedglets.

**A:** a similarity tree of Hh sequences encompassing the calcium and zinc coordinating motifs. All Hhs are closely related and root from within the BacHhs. Hedglings (present in Choanoflagellates, Sponges, and Cnidarians) and Hedglets (present in Lophotrochozoans, Amphioxus and Echinoderms) form outgroups, but

all are related to bacterial M15 peptidases. Organisms in the same phylum or clade are color coded, and common names of the organisms are used. The sequences used, their accession numbers, and numbering of aligned residues can be found in this supplemental file. Hedglings and Hedglets (red borders) are predicted to be unable to mediate catalysis. **B:** PCA plot of the tree presented in A. **C:** Structure of Shh with salient residues and domains indicated. **D:** Sequence lineup of the conserved domains of Mesorhizobium BacHh (ESZ55121.1), human Dhh (NP\_066382.1), and Choanoflagellate Hedgling (XP\_001749037.1). Identical residues are indicated in amber. Salient residues are color coded and color coordinated with C.

**Supplementary Figure 1 Sequences.** Below are the sequences used to generate the tree and PCA plot shown in Supplementary Figure 1. Accession number and stretch of residues used in the lineups are indicated.

>Monosiga brevicollis, [XP\\_001749037.1](#), 354-458  
GLSFAPSSGNMYPNVVSARMASRLKVLANLVPRVFGESA AVLVLDAYRAAPLVAAEATLHNTGRAALLTVINVTASLDDELAALASVCADA  
GFDVYVLYNSSAAIY

>Human, [BAA33523.2](#), 89-193  
IIFKDEENTGADRLMTQRCKDRLNLSLAISVMNQWPGVKLRVTEGWDEDEGHHSEESLHYEGRAVDITTSRDRNKYGLLARLAVEAGFDWVY  
YESKAHVHCSVKSE

>Mesorhizobium sp. L103C131B0, [ESZ55121.1](#), 173-277  
IVFKDEENTGADRMMPRLKSKLDSLAVVASEWPGAKLRVTEAWDEDENEHADASLHYEGRADLTTPVDGAKLGRRLARLAVDAGCDWVF  
FEDSSHIHVSVKAG

>Micromonospora sp. HK10, [WP\\_082159544.1](#), 1063-1166  
IVFKDEEKTADRMMPRLRDMVNELAALVVKQWPGKLRVTEGWDEENNEHTAESTHYEGRAVDMTVSDLDAKLGRLARLAVDAGFDWVF  
YENALHVHASVKK

>Nematostella1 vectensis [XP\\_001635678.1](#), 84-187  
IVFKDEERTGADRLMSKRCREKLRNLATKVKQKWKGVKLRVTEAWDEDEGQHSLSLSLHYEGRAVDISTSDKDPKLPDLGSLAVDAGFDWVY  
YDRRSSIHASVRS

>Nematostella2 vectensis, [ABX84114.1](#), 69-171  
EVVFENDDCRRTTARAKSKLDVLA SRVRQEWAGRKLKVIKAWTDQRTAQDPASLHYEGRALRLQLDNDRSMLSRLAGLALASGFDWVSYF  
LNSDYIHASVIRA

>Pseudoalteromonas piratica, [WP\\_040135141.1](#), 60-162  
PVFKFEEGNFTDVQASEKLC AAIMDLNKLVMKEWPGKTLRVTEAYDQDGEHAKFSLHNEGRAADMTVSDRDLKKGRLGLFLATKAGFSWVY  
YEHNHIHASVKR

>Spirosoma aerolatum, [WP\\_080055297.1](#), 211-317  
VVFKNEEGDGSDRMMPVLKTHVDRLADLVRSEWGAGVSLRVTEAWDDTGEHSSSHSLHYEGRAVDLTTSDDLKSKLGRGLAVDAGFNW  
VYYENLLHIHASVTKA

>Varroa destructor, [XP\\_022667503.1](#), 83-186  
IRFLDDEGTGADRIMTQRCKRDLDTLAVSVMTQWPGVKLRVIESWDEYSHHKSGSLHYEGRAVDFTTDDRQAKYGMRLARLAVEAGFDWVY  
YETKRHVHASVKP

>Drosophila melanogaster, [NP\\_001034065.1](#), 144-247  
ILFRDEEGTGADRLMSKRCREKLNVLAYSVMNEWPGIRLLVTESWDEDEYHHGQESLHYEGRAVTIATSDRDQSKYGMRLARLAVEAGFDWVS  
YVSRRHICYSVKS

>Crocodylus porosus, [XP\\_019386078.1](#), 87-190  
IIFKDEENTGADRLMTQRCKDKLNALAISVMNQWPGVKLRVTEGWDEDEGHHSEESLHYEGRAVDITTSRDRSKYGMRLARLAVEAGFDWVY  
YESKAHIHCSVKA

>Amphimedon queenslandica, [ABX90059.1](#), 74-180

SSQATYLHFASSDCRIMSSRLYTRLSSLAEEAYWRYHIKILVLKAWTPYPDYSLDNTSLHYEGRSVRIHVTSRNVTRLLKMAVSAGFDWVM  
YDKKGYARMSVIPDAC

>Salpingoeca rosetta, [XP\\_004997926.1](#), 540-646  
TVKPDPTSNGDPVSMKRLRRHITTLASVVRGVFGDDAYVRVLEAYVEPPADISKASLHNVGRAARITIEGVPDDFASDRLGVLGGLAVE  
AGFDYVAYTSRDSLYV

>Orbicella1 faveolata, [XP\\_020616832.1](#), 68-170  
IVFANDDCRRMTARAKSKLDVLSRVKRWNSNAKLKVLAWTDQIIPQAPISLHYEGRALRLQTS DGDRKKLSTLAGLAVQAGFDWVHYAT  
SSYIHASVIRDV

>Pocilloporal damicornis, [XP\\_027055961.1](#), 66-167  
EIDFANDDCRRMTARAKSKLDVLSRVKRWNSNAKLKVLAWTDQIMPQAPISLHYEGRAVRLQTS DGDTGKLS TLAGLAVQAGFDWVHYA  
TNSYIHASVIR

>Hydra vulgaris, [XP\\_004209904.1](#), 72-174  
IDFQTEDSRLMTSRKQKIDTLAGLVTTTRFGKNMKVNVLKAWTDVVEKEDKLSLHYEGRAFLIRASNNDKLLSDMLVLAREAGFDWVYK  
NEDSIYLSVIPD

>Orbicella2 faveolata, [XP\\_020632016.1](#), 84-183  
IIFRDEEGTGADRLMSKRCKELTTLAGLVKGEWPSVKLVVTEAWDEQDQHS PNSLHYEGRAVDLRLSDRDKTKIGLLGRLAVEAGFDWVL  
YESRSHIHA

>Pocillopora2 damicornis, [XP\\_027044648.1](#), 88-190  
IIFKDEEGTGADRLMSKRCQDKLNTLADLVRQWPTVKLVVTEAWDEQDQHS NSLHYEGRAVDLRLSDKDRTKIGYLGRLAVDAGFDWVY  
YQKRTHIHASVR

>Exaiptasia pallida, [XP\\_020892909.1](#), 87-190  
IVFKDEEGTGADRIMSKRLREKLRILAKKVKEKWRGSTRLRVIEAWDEDGTHSAHSLHYEGRAVDITTS DLDKQKYPELGRLAVEAGFDWV  
FYESQEHIHASVY

>Acidobacteria bacterium, [PYS76727.1](#), 46-149  
IVFKDEEHTGDDRMMSRSLRSARVDDLAARVKREFPGLKLRITEAWDDSTIHAPTSRHLEGRAVDITTS DVHKKLGRLAGLAVEAGFDWV  
FENDLHVHASVKK

>Bacillus pseudomycoloides, [WP\\_098188151.1](#), 989-1092  
IQFKDEEGTGADFLMSTRSLSDKLNLTALILVNQEWPNIKLRVTEAWDEDNEHSSGSTHYEGRAADITTS DRDGNKLGRLAQLAVDAGFDWVY  
YENKYHIHVS VKK

>Proteobacteria bacterium, [PZN23661.1](#), 96-197  
IVFKDEEATGADLLMTPRLRLRLHELARLVREWPGVRLRVTEAWDEDSEHGENSEIHYEGRAVDVTTSDRRRKLGRLAGLAIQAGFDWVS  
HERDHVHASVR

>Vogelbacteria bacterium, [OHA60126.1](#), 199-302  
ANGYSGINGPGRTRVHRDVAEATVWVQQLNSDHNLS TQITAAHTEGVGHSAGSEHYEGRAVDIQPTGGNVTS SNLNI IADYCRQAGFTY  
VLVENRHVHCDAR

>Methylocaldum marinum, [WP\\_119628113.1](#), 46-148  
KSQPPIAVKKGAILAGLDRRMYFALQKARRVWSRYGKLLVVTSGLDGRHKKGSLHYVGLAVDLRSRYFAPSTRRTVTRELRRNLGDEFQVI  
DEKHHIHVEFDP

>Fibrobacter sp., [WP\\_143394061.1](#), 26-138  
NLLIKRVQLKTGVYTGKLDAA MDSAGLVVVAEYHKVMGDSYRPTITSANDYGKHARRSKHYENKALDFRISDVPRNKRSQIVASIRQALGK  
RFNVFWEKNTANEHLHIELKE

>Chlamydia trachomatis, [CRH64334.1](#), 1-102  
MLQFKNNVRLSGVQEEILFIIDRIQRYFEVRLPKRDFVITSLTDGAHMKGSLHPKGLALDMRSRTLDKKEIEYFVTWFRKNFEKSYDLVVE  
IDHIIHIEYDPK

>Parcubacteria group bacterium, [PSO44215.1](#), 232-331  
ASGFRGIAGPRTGKVKQPWVEKTKQIQEICENRYGGRPFQVTA ACTYGVGHSNDSTHYRGEAVDLPVDATNQQVISCVKEAGGVPYYLD  
EDSHIHSS

>Robiginitomaculum sp., [PHQ68463.1](#), 158-262  
DENDIDIKEGADISDLTDDMTDTFDDISEAWADEAPGVTPVITSGGDGTHSTNSLHYDGNVAVDLRTNNTLQAQT TTVASALSTSLGSDYDV  
VVESDHIHVEYDPG

>Lentisphaerales bacterium, [TFH13511.1](#), 91-194  
WESDHDGENDEDHLMHRGVQPLLNQLEKAVASCGAALKVHDASRPSGGHCATSLHKEGRALDLTADGLTLEDLAKLCWVAGFDWVFNEN  
KRGAEHVHCSRA

>Paraglaciecola hydrolytica, [WP\\_068382217.1](#), 63-166  
VVIKFEEGDCSDSKVTKNLKKTIKFLVELIDQEWEGERKLRITEAWDNNAEHTKYSLNHNEGRAADITTTDDRDTKKLSKLACLAMAAGFSWV  
KLEKDHVHASVPR

>Rhizobium leguminosarum, [WP\\_130783679.1](#), 310-413  
IVFKDEEGTGADRMM SARLRDGLDRLAAQVGIWPDVKLRVTEAWDENNEHHGASLHYEGRAADLTTSRDPGDKLGRGLKLAVDAGLDWVF  
FENSAHIHVSVKR

>Verrucomicrobia bacterium, [HCF95878.1](#), 132-232  
ESDHDGDWDTENDHLVHRDILPALIRLNALVLEQEGATLKIQDAYREEGIHAPASLHREGRALDLTADGMSLARLAQLAVQAGFDWVYYESP  
KGGGAHIHAS

>Myxococcales bacterium, [RYZ03269.1](#), 109-212  
IVFKDEERNRDRFMTPLRRLSLVQLSKLVSQTWPKVLDLRVTEAWDDREHGAGSVHYEGRAADITTSQDPAKLGTLAALAVKAGFDWVF  
YENATHVHVSVKR

>Branchiostoma1 floridae, [XP\\_002599309.1](#), 305-414  
RMLGSSLDRCADRVM SKALLDHLRTVQRMVQDEFSGVKLVLEAWDEPHAGATTGDHPAGSLHYEGRAAKLTLSGDAAKLPRLA AFCIC  
DGAGYVENKGDHILVAVQK

>Pseudonocardia dioxanivorans, [WP\\_103381118.1](#), 106-208  
VVKDEEGSGADRMMTPRLAELVGVLAHVAVQAFPGRRRLRLTEAWDPDGEHSHSSLHYEGRAADLTVD DRRAKLGRLAALAVQTGF DWVLH  
ENDHVHVSVRAG

>Branchiostoma2 belcheri, [XP\\_019614930.1](#), 311-413  
DRCADRVMTKSMLDLLRKVQKMKVDEFTGVKLVLEAWDEPHAGATEGDQPAESLHFEGRAAKLTLDGDTSKLPQLAKNAICAGANFVEH  
KGDHIFVAVRKQ

>Acanthaster planci, [XP\\_022111291.1](#), 310-422  
HMKGFALNSRCADRMTSARL MATLKTGKLVSIWEPGVKLLVLEAWDEAHEGSTYTDGQDPAGSLHYEGRAAKLSLSDGDTSKFSRLAGLA  
TCAAADYVEHNGDHIFVAAKKQ

>Sepia bandensis, [ALM01450.1](#), 32-143  
IVFRDEESNNE DRMM SKRCKDKLNTLAIAMNEWPGVKLRVTEAWDTEGHHAPTSLHYEGRAVDITTS DRERSRYGMLARLAVEAGFDWVY  
YESRSIHCSVR

>Lottia gigantea, [XP\\_009064322.1](#), 299-407  
EKPLGNSLNQRCAARLMSQRMYNVLI SLQLKVRANGDKLVKEQAFDEKYAGHVADFDATS LYTEGRLVKVTRSVNPSLAN YKKLTQWAICS  
KADFVQNGD HVLIGVKK

>Crassostrea virginica, [XP\\_022317995.1](#), 275-379  
YPGNYLPNRCAVRVMSRPLFNVLVNLKAYASDANLGGPGGKITVEEAWDGGADPSSLRSEGRMIKVKLSAGNTAANLGKLAQLAICAKADH  
VSNMGTHLLLSVKK

>Mizuhopecten yessoensis, [XP\\_021349176.1](#), 304-415  
GIVGSALSKRCAARTMSYRMKVINTLQK FVRHNMTLTDKLVKAWDEPYADATTGDTSYSRLHTEGRAVVQLVSSNTASNLEELSHFA  
ICAGADFISHKGDKLEIAVKK

>Bradyrhizobium sp. WSM4349, [WP\\_018460114.1](#), 210-314  
SIVFKDEEGTGADRMMSTRMQAKLDALASLVSAEWPGVKLRVTEAWDENDEHSPTALHYEGRAADITTPPDGAKLGRRLARLAVNAGCDWV  
FYEDTNHVHVSVKK

>Paenibacillus sp. CAA11, [WP\\_108465644.1](#), 1027-1131  
DIVFKDEEGTGADKVM SKRMKEKLDKLAELVKKEWPSLKL RVTECWDENNEHSSNSTHYEGRGADLTTS DVDKSKLGRGLQAVDAGLDWV  
FYENDAHIHVSVKK

>Columba livia, [PKK32334.1](#), 86-190  
DIIFKDEENTGADRMLTQRCKDKLNALAI SVMNQWPGVKLRVTEGWDEDGHHSEESLHYEGRAVDITTS DRDRSKYGM LARLAVEAGFDWV  
YYESKAHIHCSVKA

>Ptychodera flava, [BAR45718.1](#), 88-192

DIIFKDEEGTGADRLMTQRCKDKLNSLAILVMNQWEGIQLRVTEGWDEDGHHHAENSLHYEGRAVDITTSDRDKKYGMLARLAVQAGFDWV  
YFESKSHVHCSVRS

>Antalis entails, [APD15681.1](#), 86-190  
DIVFKDEEGTGADRMMSKTCRDKLDTLAI FVMNQWTVGVKLRVTEAWDEEHHHAKDSLHYEGRAVDVTTSDRDRSKYGMLARLAVNAGFDWV  
YYESRAHIHCSVNS

>Helobdella robusta, [AAM70491.1](#), 270-374  
NII FQNSEGTGADRVMKRCSDKLNLSLMEQWPGVRLRVVEAWDEDETHPEDSLHYEGRAVDVTTSDKDKSKYGMLARLAVEAGFDWV  
HYEYRSHIHCSVKS

>Oryzias melastigma, [ACL81248.1](#), 46-150  
DIIFKDEENTGADRLMTQRCKDKLNSLAISVMNQWPGVKLRVTEGWDEGDHGFEEESLHYEGRAVDITTSDRDKSKYGTLSRLAVEAGFDWV  
YYESKAHIHCSVKA

>Trichuris suis, [KFD51835.1](#), 95-199  
NIVFKDEEGTGADRIMTNRCRYKLNLLALVSNFVWPGVRLRVDAWEERNRQVVGSLHYEGRAVDITTSDRDNRKIPRLARLAVQAGFDWV  
YFESRQHVHASVKS

>Capitella teleta, [AAZ04357.1](#), 82-186  
DVVFKDEEGTGADRIMSQRCKDKINTLAISVMNQWPGVKLKRVTEAWDEEDGFHAKDSLHYEGRAVDITTD RDRSKYGMLARLAVEAGFDWV  
YYENRGHIHCSVKS

>Pipra filicauda, [XP\\_027590561.1](#), 84-188  
DIIFKDEENTGADRLMTQRCKDRLNSLAISVMNQWPGVKLRVTEGWDEGDHGHSEESLHYEGRAVDITTSDRDRNKYGMLARLAVEAGFDWV  
YYESKAHIHCSVKS

>Branchiostoma3 floridae, [XP\\_002607850.1](#), 269-370  
HPVGFTPSQRCADRVMKRLYTALLRVDKHVREQLNARLRITEAWDEPHSGAADGDQAENSLHYEGRAAKLELSGSSDLTSLAKYCICADI  
DYVEHKGTYLF

>Acropora millepora, [XP\\_029199742.1](#), 68-170  
EIDFANDDCRRMTARAKSKIDVLASRVGRWSNVRLRVILGWTDQIPVDTQKLLHYEGRALRLQTSDRDSSKLRITLAGLAVEAGFDWVYYA  
SSSYIHASVIRD

>Euperipatoides kanangrensis, [VDH80594.1](#), 88-190  
IIFKDEEGTGADRLMTQRCKEKLNTLAISVMNQWPGIKLRVTEAWDEEDNHHSAESLHYEGRAVDITTSDRDRSKYGMLARLAVEAGFDWV  
YESRAHIHCSVK

## Supplementary Figure 2

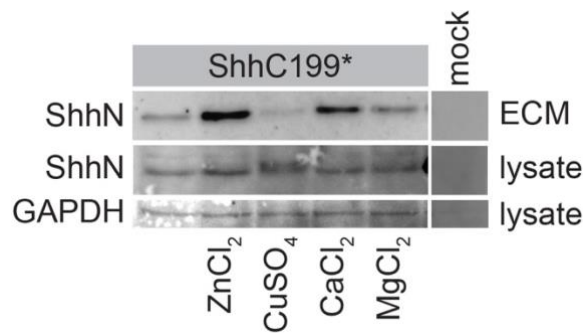

**Supplementary Figure 2:** Association of Shh with the ECM is enhanced specifically in response to zinc. Western blot analysis of the lysate and ECM of Hek293t cells transfected with *Shh-C199\** and cultured in medium containing 0.18 mM calcium and 5  $\mu$ M zinc, 5  $\mu$ M copper, 1.8 mM magnesium or 1.8 mM calcium as indicated.

Supplementary Figure 3: Uncropped and unedited gel and Western blots for Figure 1:

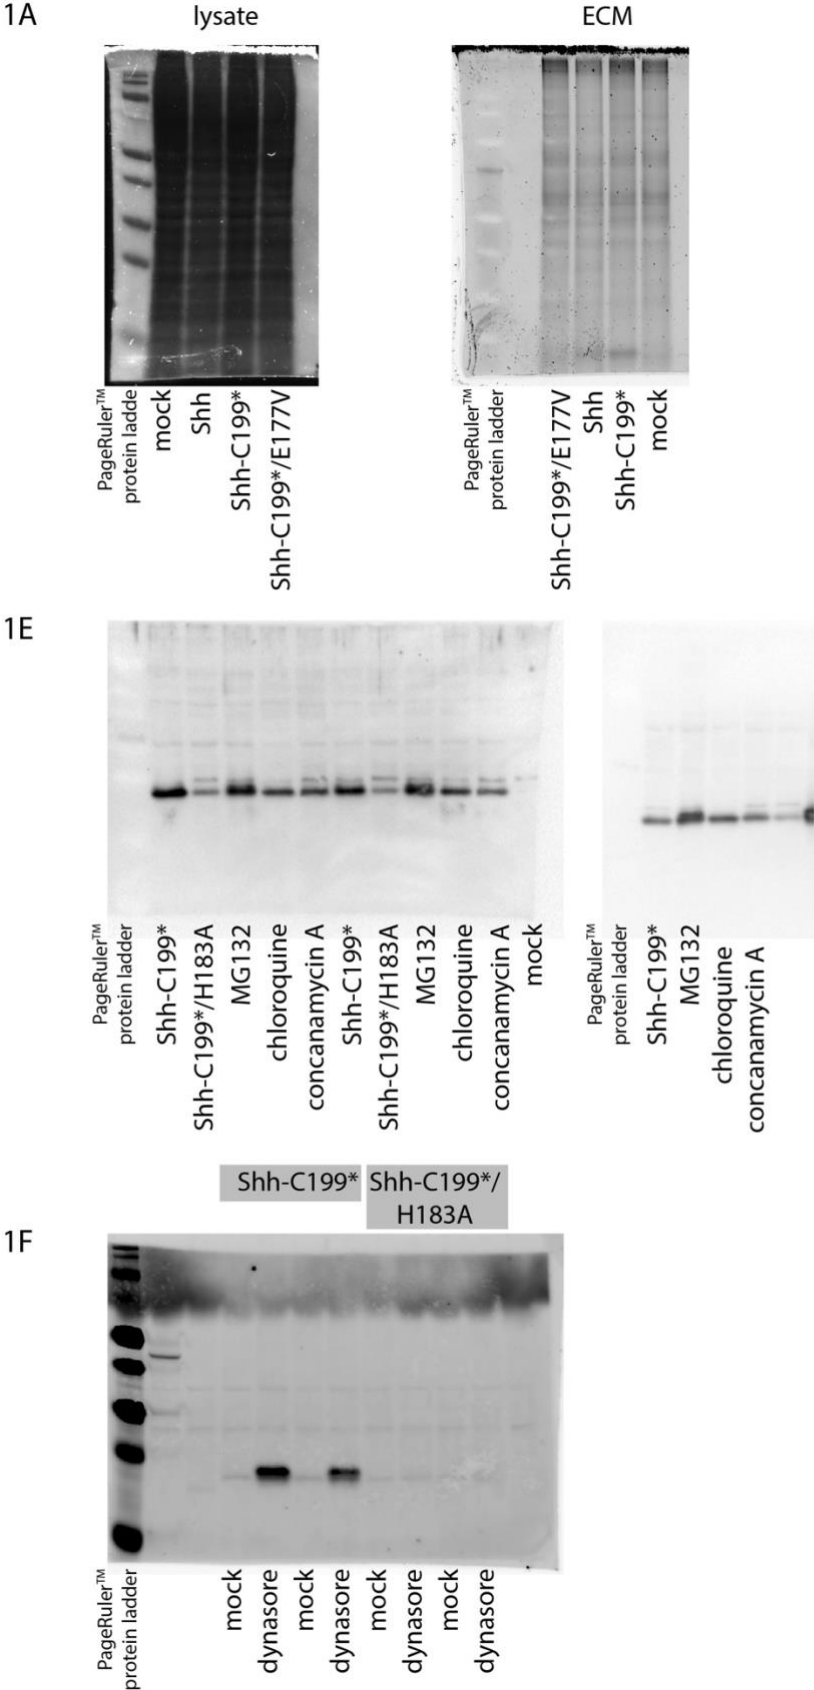



**Supplementary Figure 3: Active ShhN associates with the extracellular matrix.**

**A:** Lysate and ECM deposited by mock and *Shh-C199\**-transfected Hek293t cells analyzed by SDS-PAGE and SYPRO-Ruby staining. ShhN is indicated. **E:** Western blot analysis of HEK293t cells transfected with the indicated Shh mutants. 100 nM MG-132 (proteasome inhibitor), 100 nM Chloroquine and 100 nM Concanamycin A (inhibitors of endosome acidification) were assessed for their ability to affect Shh accumulation. **F:** Western blot analysis of HEK293t cells transfected with the indicated Shh mutants, and the effects of the dynamin inhibitor Dynasore (50  $\mu$ M) was assessed for its effect on Shh accumulation. M = (PageRuler pre-stained protein ladder)

**Supplementary Figure 4: uncropped and unedited Western blots for Figure 2**

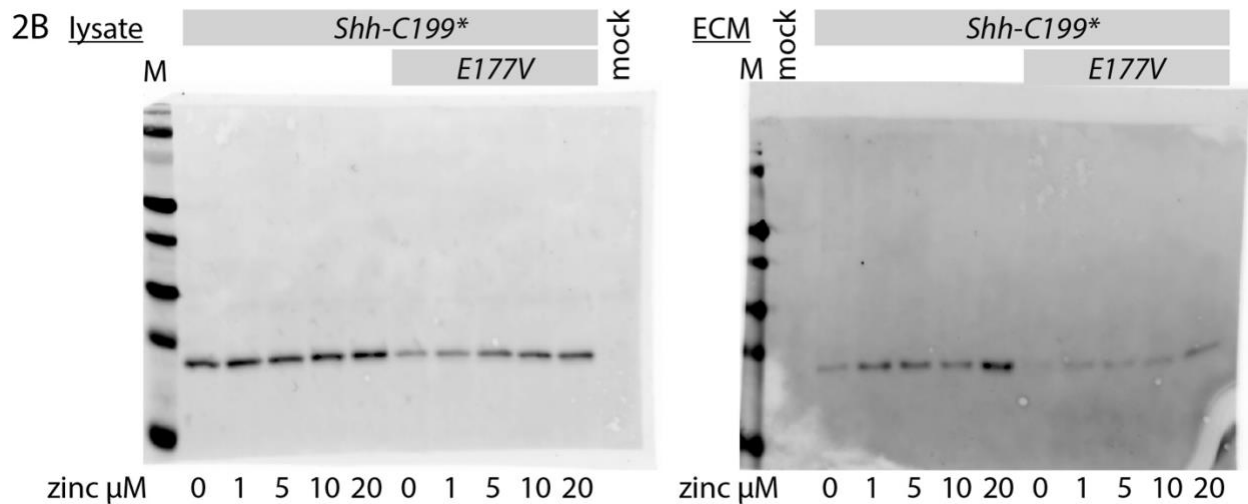

**Supplementary Figure 4: ECM-association of ShhN requires zinc and the catalytic E177V residue. B:** Western blot analysis of the lysate and ECM of HEK293t cells transfected with *Shh-C199\** and *Shh-C199\*/E177V* and cultured in DMEM containing 0.18 mM calcium and the indicated concentrations of zinc. M = (PageRuler pre-stained protein ladder)

Supplementary Figure 5: uncropped and unedited Western blots for Figure 3

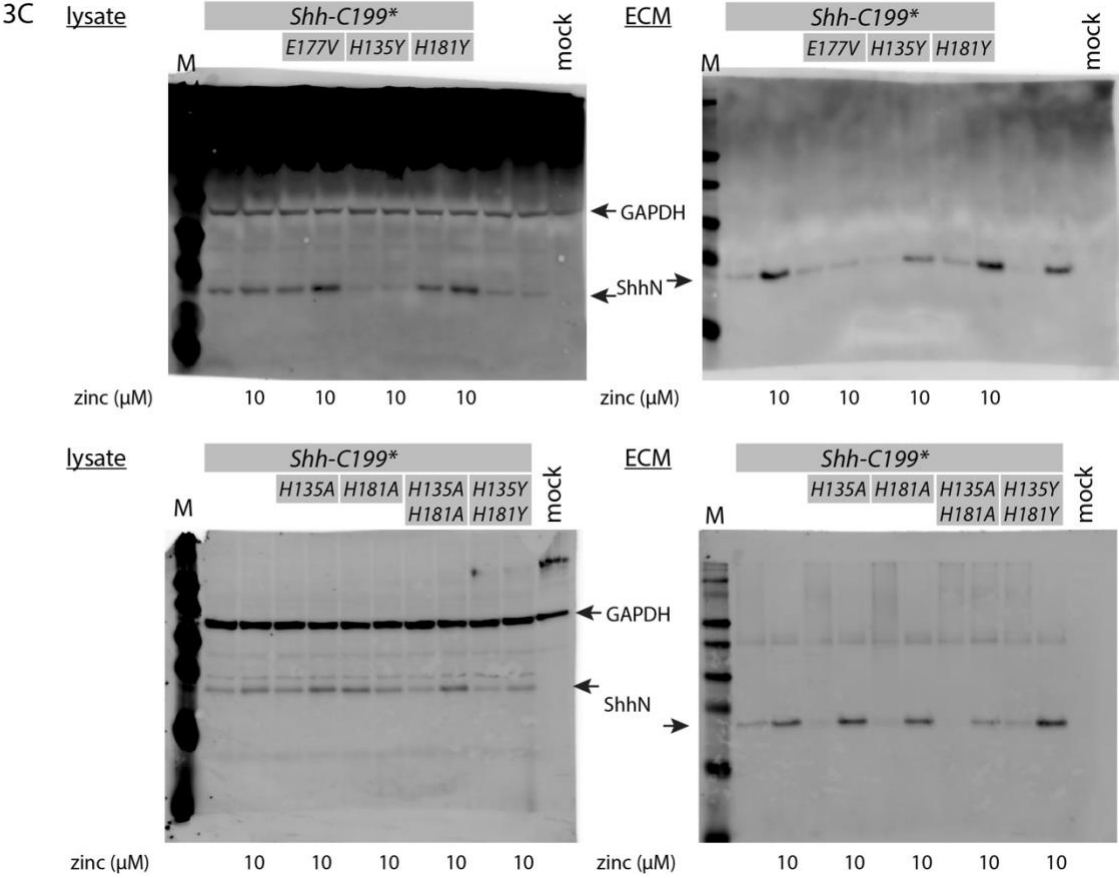

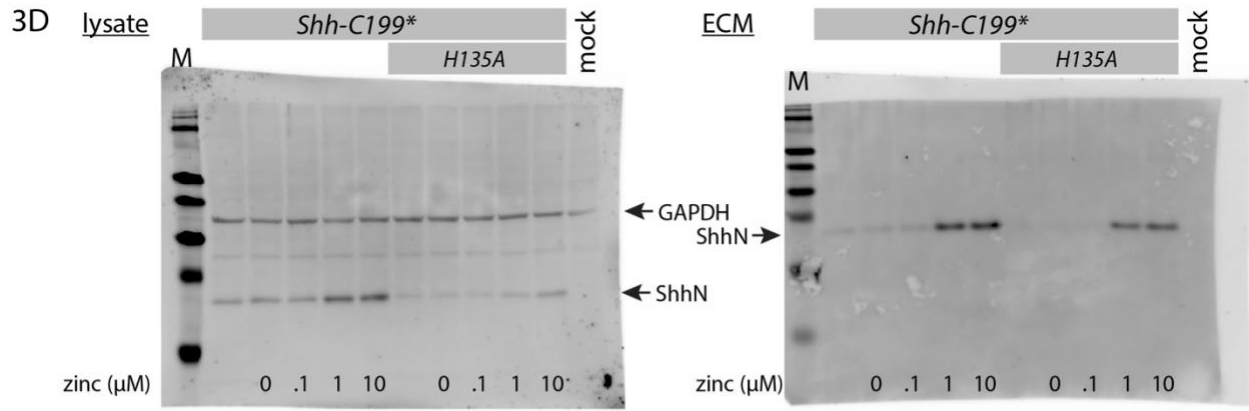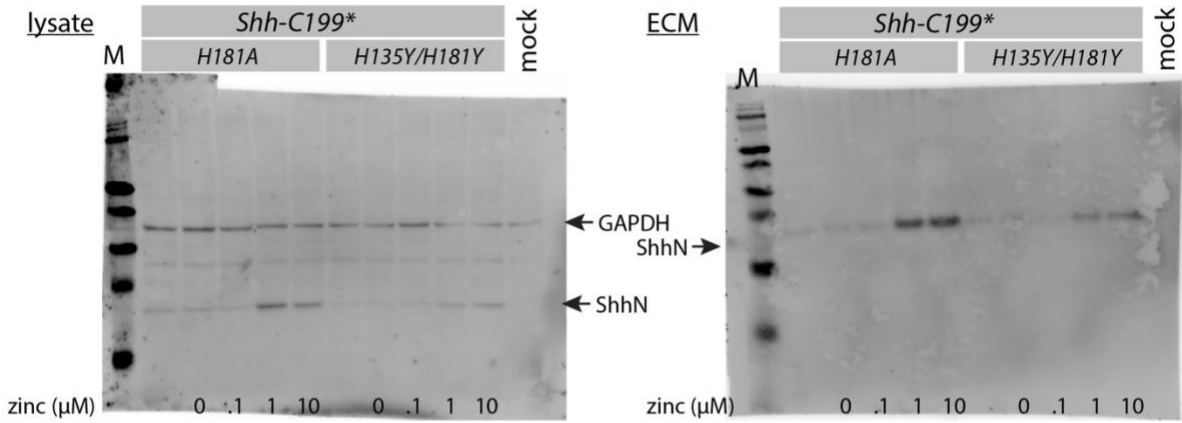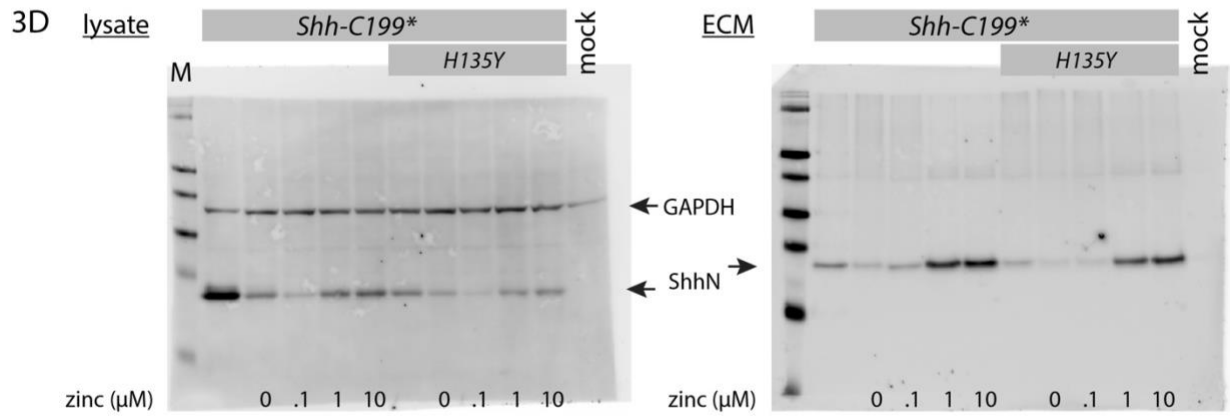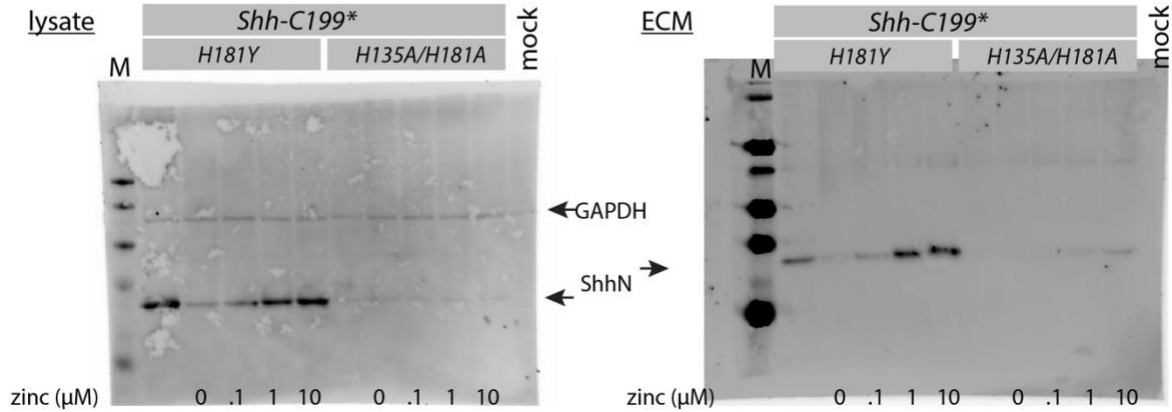

**Supplementary Figure 5: Stacking histidines of the zinc coordination center affect ECM**

**association. C:** The effect of mutations of the transition state-stabilizing residues H135 and H181 to alanine (A) or tyrosine (Y) on the zinc-dependent accumulation in the ECM was analyzed on a Western Blot of the extracted ECM from transfected HEK293t cells cultured in 0.18 mM calcium with or without 10 μM zinc. **D:** zinc dose-response analysis of H135 and H181 mutations assessed by Western blot of the lysate and ECM of HEK293t cells transfected with the indicated mutants and cultured in 0.18 mM calcium and increasing concentrations of zinc (0.1, 1, 10 μM). M = (PageRuler pre-stained protein ladder)

**Supplementary Figure 6: uncropped and unedited Western blot for Figure 4**

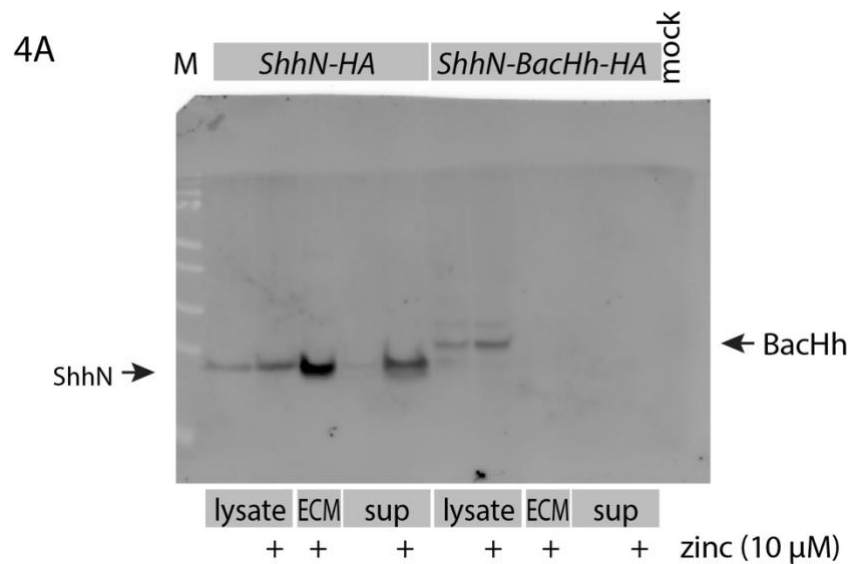

**Figure S4: The zinc-coordination domain of BacHh is not sufficient for association with the ECM. A:**

Western Blot analysis of the lysate, ECM, and supernatant of *ShhN-HA* or *Shh-BacHh-HA* (diagrams) transfected HEK293t cultured in the indicated zinc concentrations.

M = (PageRuler pre-stained protein ladder)

Supplementary Figure 7, uncropped and unedited Western blots for Figure 5

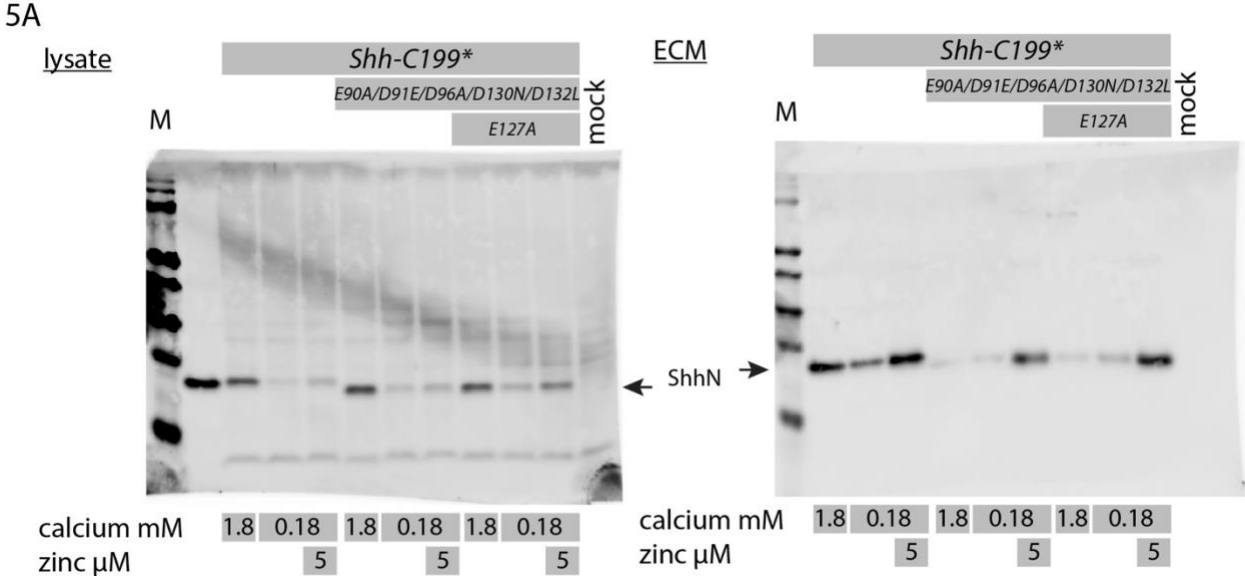

**Figure 5:** Calcium alters the sensitivity of Shh to zinc. **A:** Western blot analysis of lysates and ECM of HEK293t cells transfected with *Shh-C199\** and *Shh-C199\*/E90A/E91D/D96AD130N/D132L*, or *Shh-C199\** and *Shh-C199\*/E90A/E91D/D96A/E127A/D130N/D132L* ( $Ca^{Free}$ ), cultured in the presence of 0.18 or 1.8 mM calcium, and in the absence or presence of 5 μM added zinc. M = (PageRuler pre-stained protein ladder)

Supplementary Figure 8: uncropped and unedited Western blots for Supplementary Figure 2

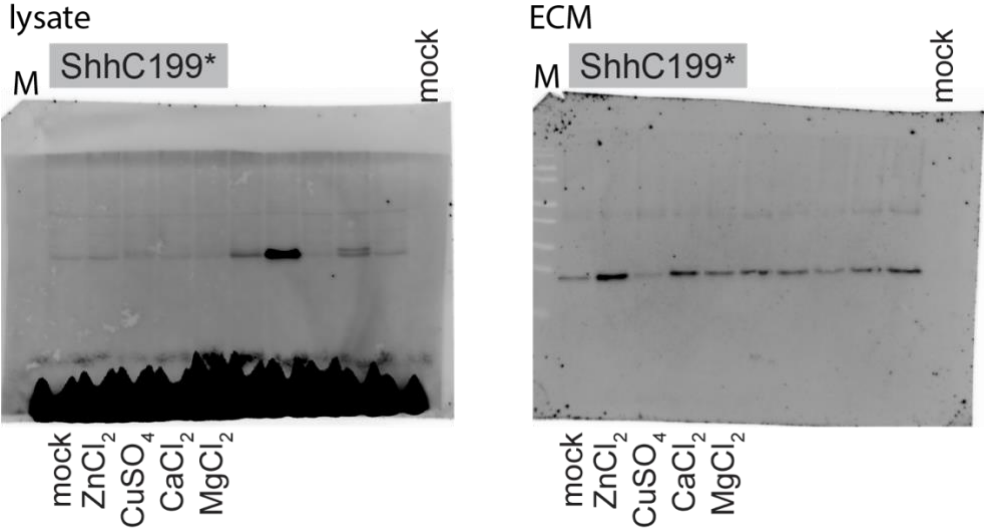

**Figure S8: Association of Shh with the ECM is enhanced specifically in response to zinc.** Western blot analysis of the lysate and ECM of Hek293t cells transfected with *Shh-C199\** and cultured in medium containing 0.18 mM calcium and 5 μM zinc, 5 μM copper, 1.8 mM magnesium or 1.8 mM calcium as indicated.
